# Supplementary material for: Validation of Visual Analogue Scales of job demand and job control at the workplace: a cross-sectional study
Source: HighWire-hosted journal article supplement (doi:10.1136/bmjopen-2020-046403), 2022-03-01

## Supplementary Appendix 2

### Relationships between each visual analog scale and items of Karasek questionnaire

**Correlation** between items from the Karasek questionnaire and each visual analog scales (job demand and job control):

|                 | Karasek questionnaire – job control items |        |        |         |         |         |         |         |         |
|-----------------|-------------------------------------------|--------|--------|---------|---------|---------|---------|---------|---------|
|                 | Item 1                                    | Item 2 | Item 3 | Item 4  | Item 5  | Item 6  | Item 7  | Item 8  | Item 9  |
| VAS job control | 0.23**                                    | 0.21** | 0.22** | 0.60*** | 0.28*** | 0.44*** | 0.32*** | 0.48*** | 0.27*** |

  

|                | Karasek questionnaire – job demand items |         |         |         |         |         |         |         |         |
|----------------|------------------------------------------|---------|---------|---------|---------|---------|---------|---------|---------|
|                | Item 10                                  | Item 11 | Item 12 | Item 13 | Item 14 | Item 15 | Item 16 | Item 17 | Item 18 |
| VAS job demand | 0.50***                                  | 0.58*** | 0.66*** | 0.45*** | 0.14    | 0.43*** | 0.44*** | 0.42*** | 0.25*** |

The result of the **principal component analysis (PCA)** was expressed with a representation on the first discriminant plane projection of items of Karasek scale (circle of correlations). The closer the items are to each other and far from the center, the more important is their correlation. The horizontal axis makes it possible to present patients with high values for the items (on the left) vs. patients with low values (right). The vertical axis makes it possible to determine within these patients with high values for the items, those more or less associated with the items at the top left of the quadrant of the correlation circle vs. those at the bottom left.

Relation between VAS control and items of the job control from Karasek questionnaire

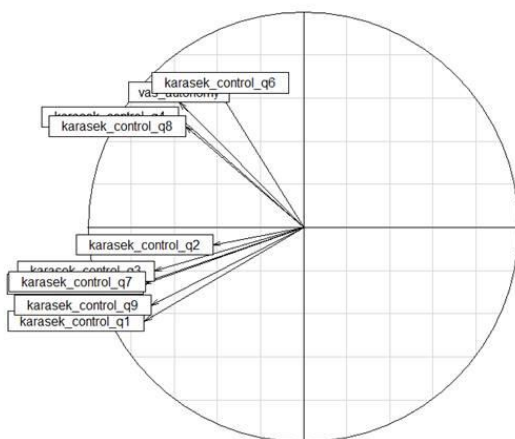

Relation between VAS demand and items of the job demand from Karasek questionnaire

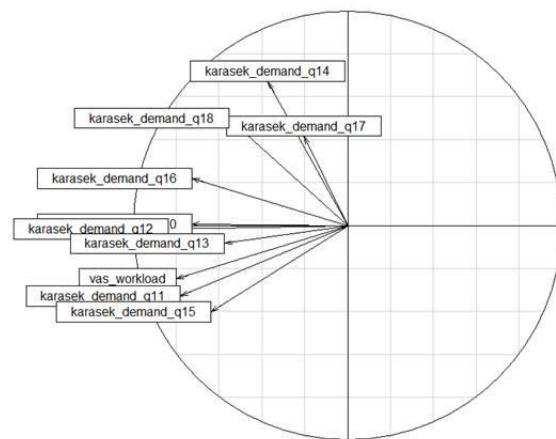

Supplement: bmjopen-2020-046403supp002_data_supplement.pdf [file bmjopen-2020-046403supp002_data_supplement.pdf]
